# Supplementary material for: Sn4P3–C nanospheres as high capacitive and ultra-stable anodes for sodium ion and lithium ion batteries
Source: Royal Society of Chemistry journal article supplement (doi:10.1039/c8ta05586f), 2018-01-01
Supplement: c8ta05586f1.pdf [file c8ta05586f1.pdf]

## Supplementary Information

### **Sn<sub>4</sub>P<sub>3</sub>-C nanospheres as high capacitive and ultra-stable anodes for sodium ion and lithium ion batteries**

*Jonghyun Choi, Won-Sik Kim, Kyeong-Ho Kim, and Seong-Hyeon Hong\**

Department of Materials Science and Engineering and Research Institute of Advanced

Materials, Seoul National University, Seoul 151-744, Republic of Korea

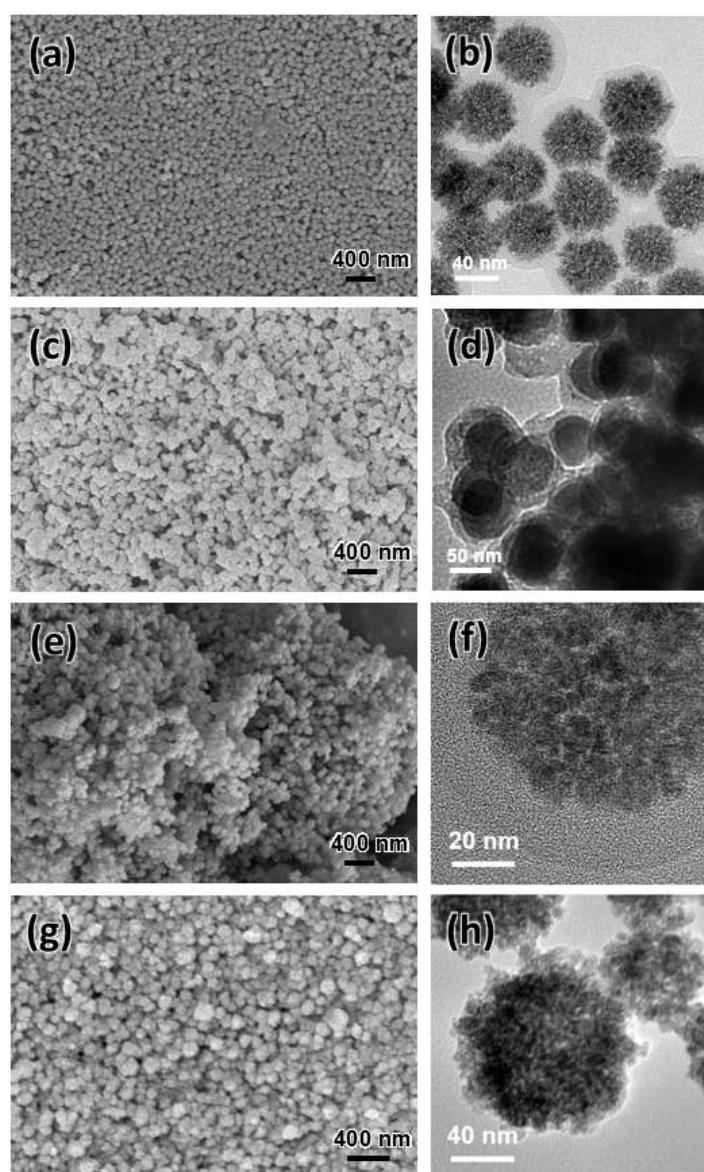

**Fig. S1** SEM and TEM images of nanospheres: (a),(b) SnO<sub>2</sub>-GCP, (c),(d) Sn-C, (e),(f) Sn<sub>4</sub>P<sub>3</sub>-C, and (g),(h) Sn<sub>4</sub>P<sub>3</sub> nanospheres.

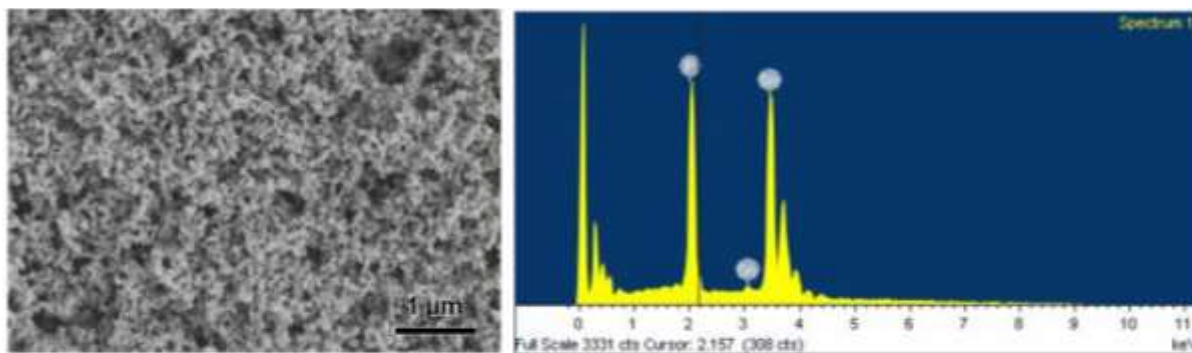

| Element | Weight % | Atomic % |
|---------|----------|----------|
| Sn      | 84.28    | 58.32    |
| P       | 15.72    | 41.68    |

Fig. S2 EDS results for the Sn<sub>4</sub>P<sub>3</sub>-C nanospheres.

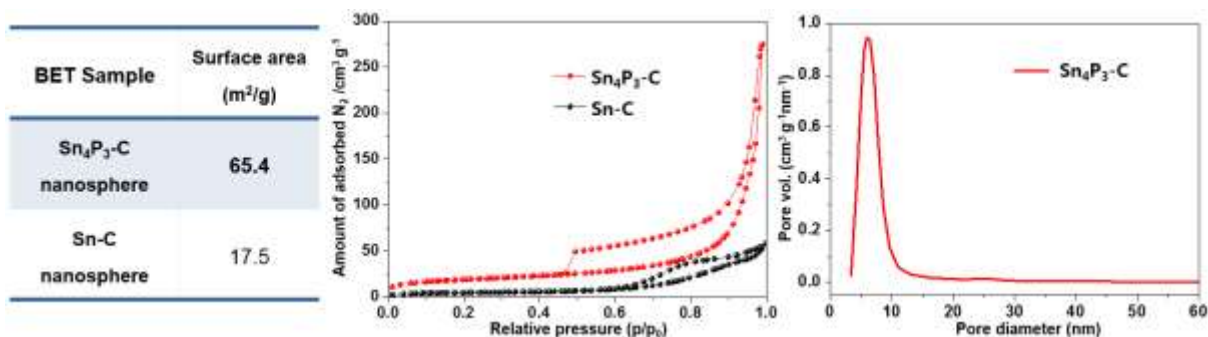

Fig. S3 BET results for the Sn-C and Sn<sub>4</sub>P<sub>3</sub>-C nanospheres.

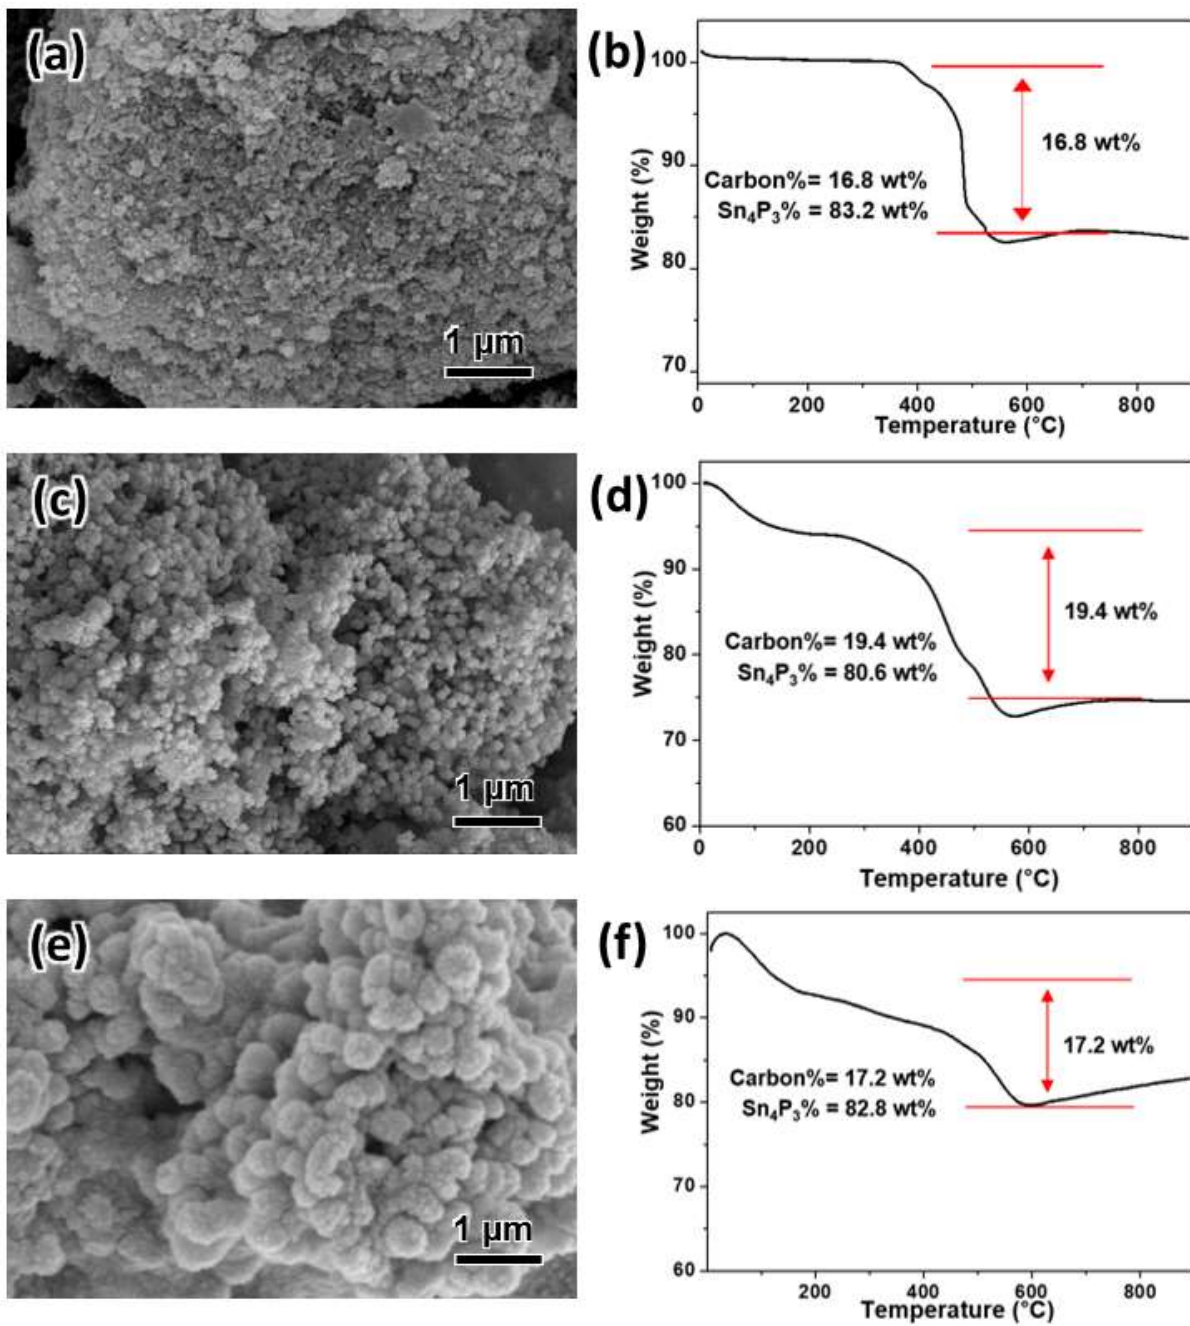

**Fig. S4.** Low magnification SEM images and TGA curves for Sn<sub>4</sub>P<sub>3</sub>-C nanospheres. (a),(b): 30 nm, (c),(d): 140 nm, and (e),(f): 300 nm.

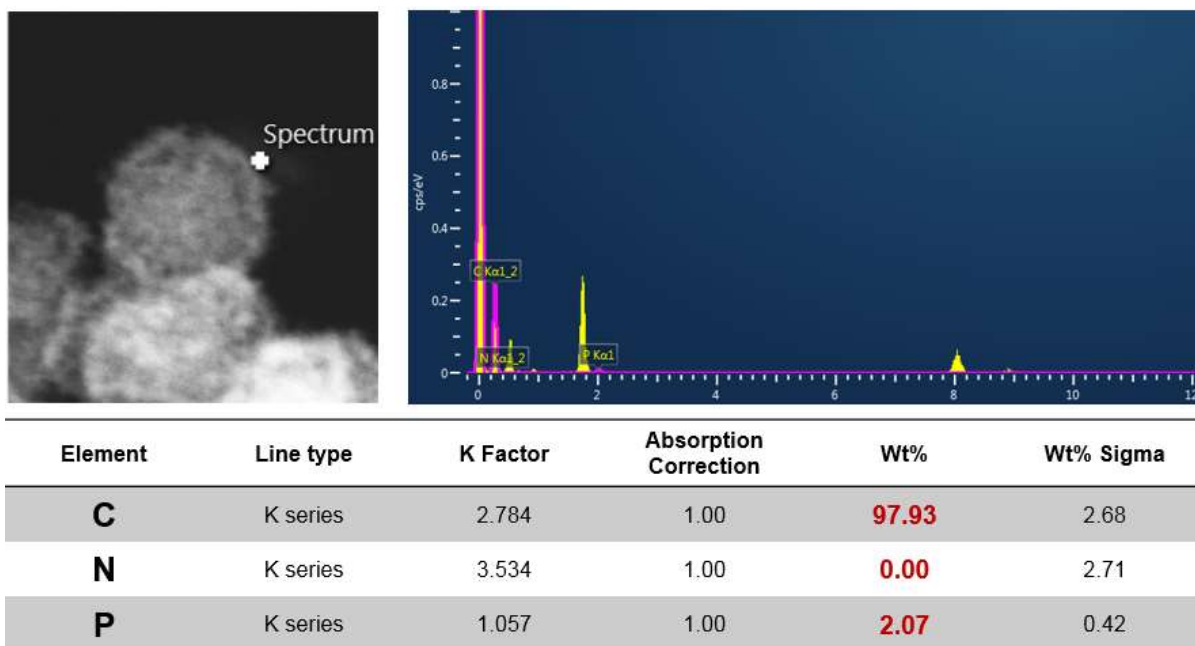

**Fig. S5.** EDS analysis of carbon shell in Sn<sub>4</sub>P<sub>3</sub>-C nanospheres.

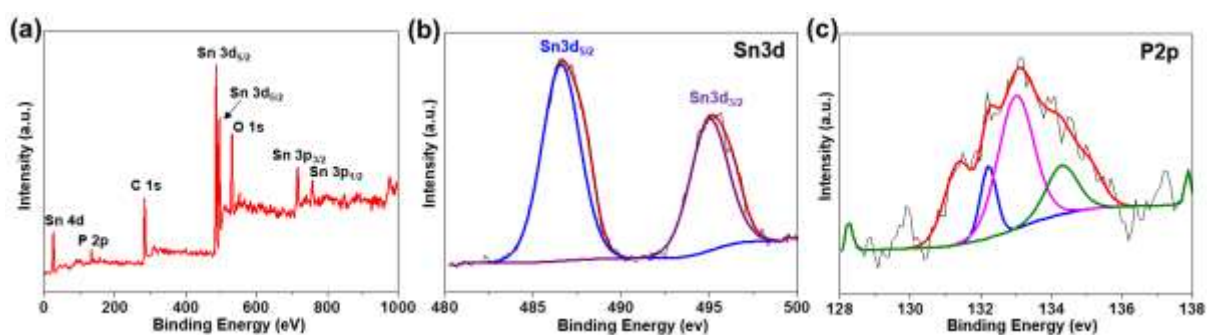

**Fig. S6.** (A) Survey, (B) Sn3d, and (C) P2p XPS spectra for Sn<sub>4</sub>P<sub>3</sub>-C nanospheres.

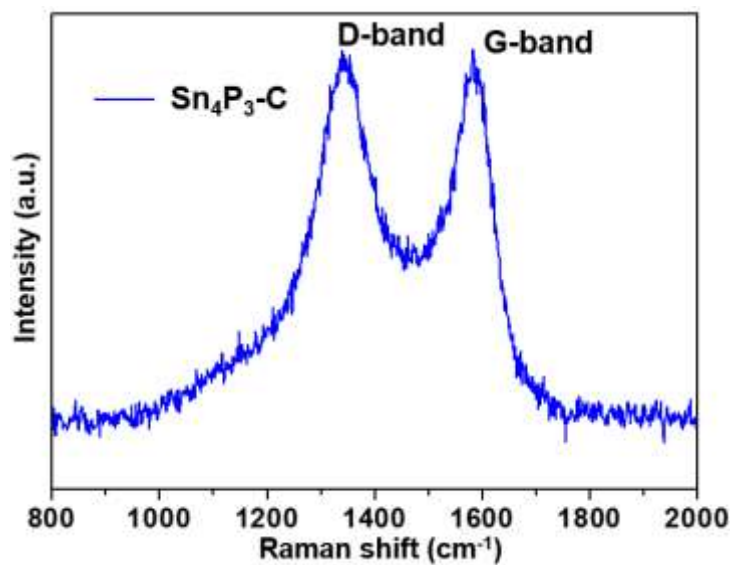

**Fig. S7.** Raman spectra of synthesized  $\text{Sn}_4\text{P}_3\text{-C}$  nanospheres.

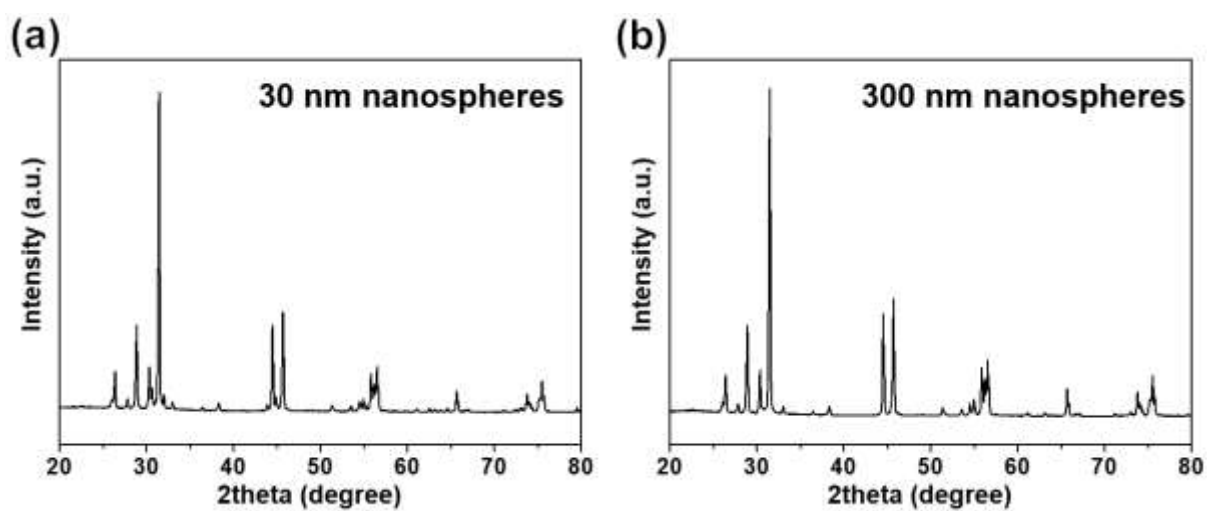

**Fig. S8.** XRD patterns of (a) 30 nm-sized and (b) 300 nm-sized  $\text{Sn}_4\text{P}_3\text{-C}$  nanospheres.

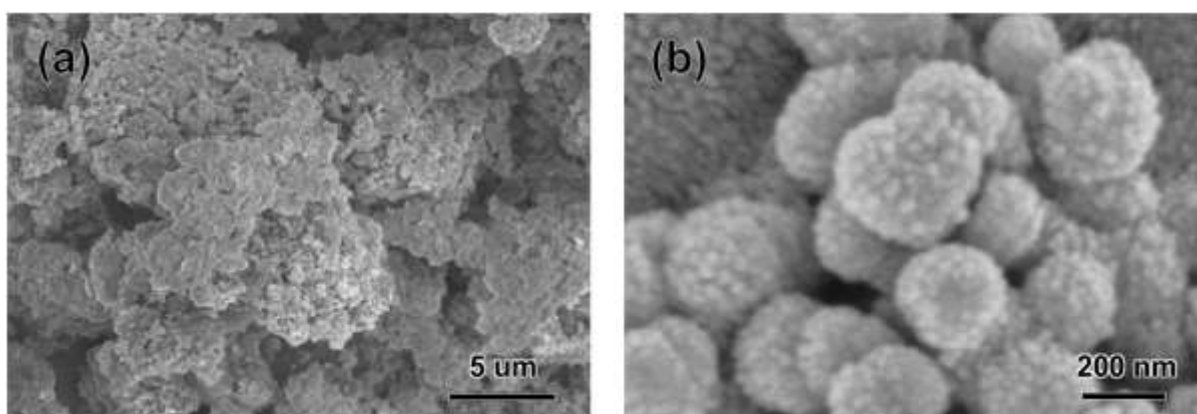

**Fig. S9.** SEM images of (a) 30 nm-sized nanosphere and (b) 300 nm-sized nanosphere electrodes after 50 cycles at  $1000 \text{ mA g}^{-1}$  for LIBs.

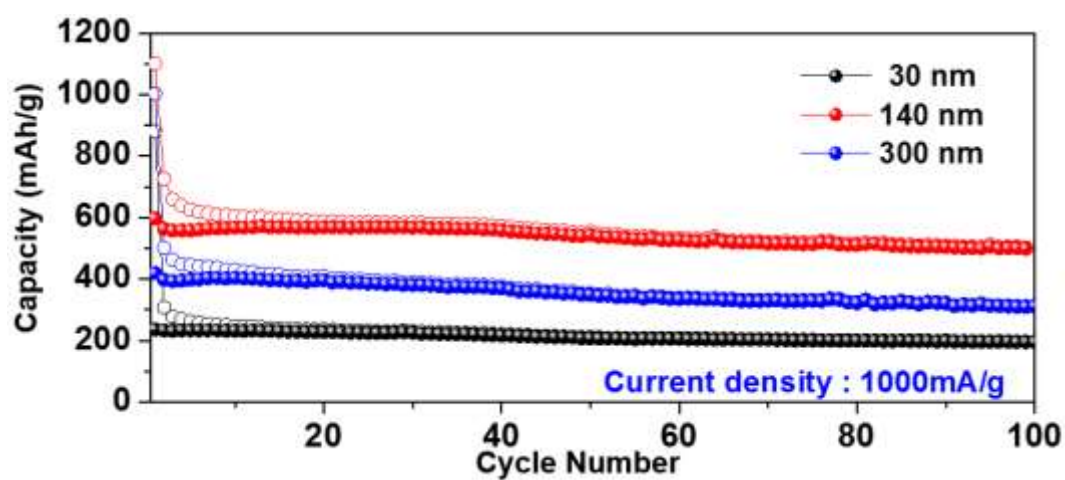

**Fig. S10.** Cyclability of 30 nm, 140 nm, and 300 nm-sized  $\text{Sn}_4\text{P}_3\text{-C}$  nanosphere electrodes at  $1000 \text{ mA g}^{-1}$  for SIB anode.

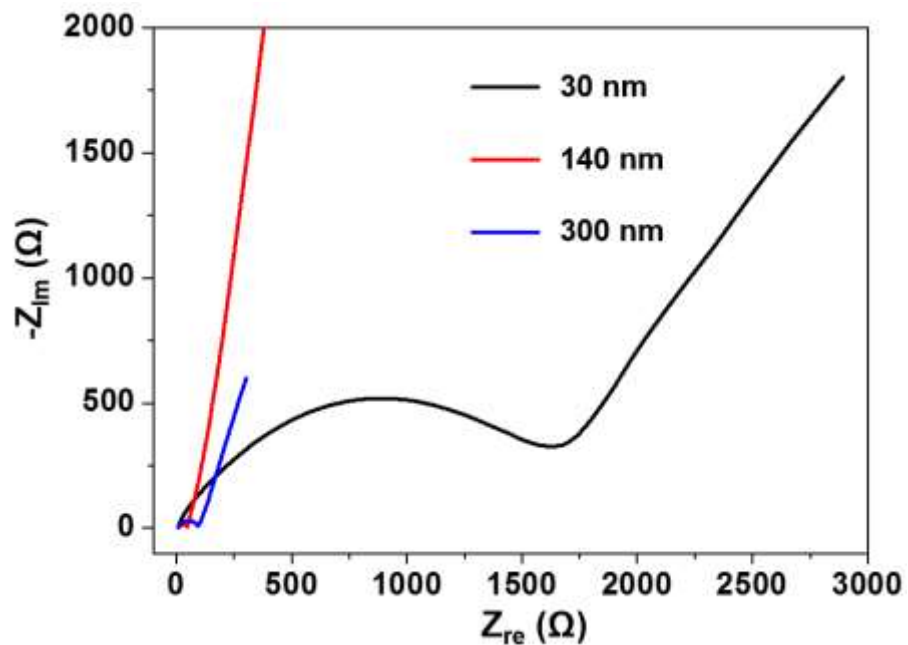

**Fig. S11.** Electrochemical impedance spectroscopy (EIS) results of 30 nm, 140 nm, and 300 nm-sized  $\text{Sn}_4\text{P}_3\text{-C}$  nanosphere electrodes.

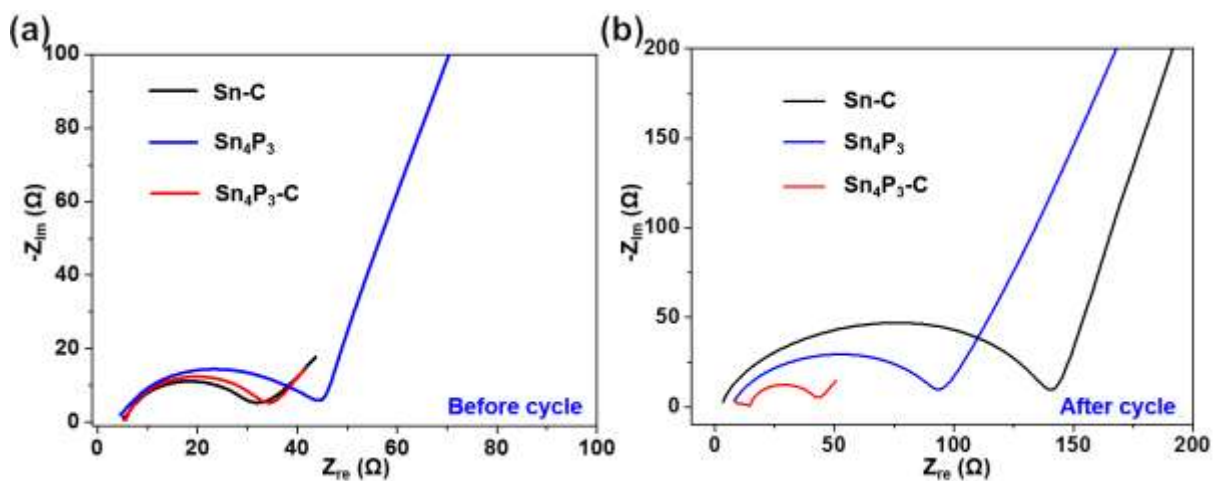

**Fig. S12.** Electrochemical impedance spectroscopy (EIS) results of Sn-C,  $\text{Sn}_4\text{P}_3$ , and  $\text{Sn}_4\text{P}_3\text{-C}$  electrodes (a) before and (b) after 50 cycles.

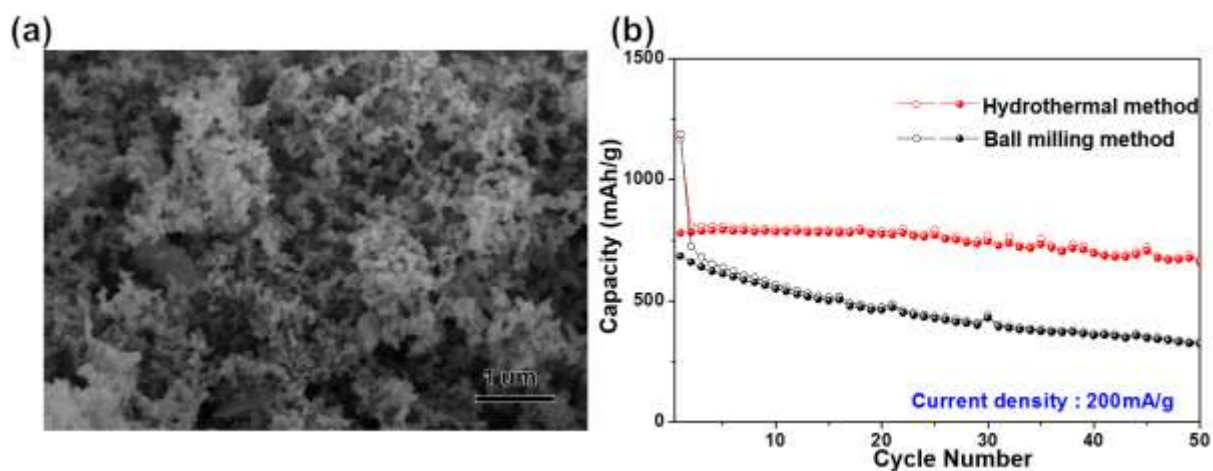

**Fig. S13.** (a) SEM image of Sn<sub>4</sub>P<sub>3</sub>/C nanocomposite synthesized by a ball milling method and (b) cyclability of Sn<sub>4</sub>P<sub>3</sub>-C nanosphere and Sn<sub>4</sub>P<sub>3</sub>/C nanocomposite electrode at 200 mA g<sup>-1</sup> for SIB anode.

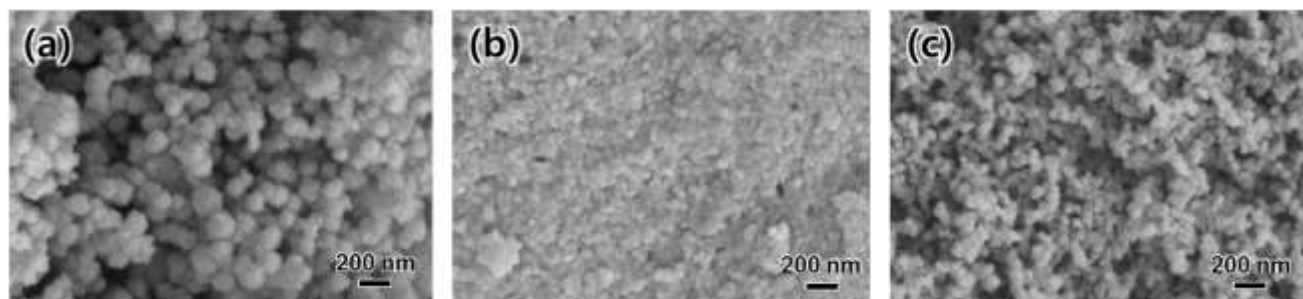

**Fig. S14.** SEM images of (a) pristine Sn<sub>4</sub>P<sub>3</sub>-C nanospheres, (b) cycled Sn<sub>4</sub>P<sub>3</sub>-C nanospheres without DMC washing process, and (c) Sn<sub>4</sub>P<sub>3</sub>-C nanospheres after DMC washing process.



**Table 1.** The electrochemical performance of some Sn<sub>4</sub>P<sub>3</sub> anode materials for SIB.

| Samples                                         | Current density<br>(mA g <sup>-1</sup> ) | Cycle number | Capacity (mA h g <sup>-1</sup> ) | Ref.      |
|-------------------------------------------------|------------------------------------------|--------------|----------------------------------|-----------|
| Sn <sub>4+x</sub> P <sub>3</sub>                | 100                                      | 100          | 465                              | [1]       |
| Sn <sub>4</sub> P <sub>3</sub> -C<br>nanosphere | 1500                                     | 400          | 360                              | [2]       |
| Sn <sub>4</sub> P <sub>3</sub>                  | 100                                      | 50           | 605                              | [3]       |
| Sn <sub>4</sub> P <sub>3</sub> /RGO             | 1000                                     | 1500         | 362                              | [4]       |
| Sn <sub>4</sub> P <sub>3</sub> /C               | 100                                      | 150          | 500                              | [5]       |
| Sn <sub>4</sub> P <sub>3</sub>                  | 100                                      | 100          | 650                              | [6]       |
| Sn <sub>4</sub> P <sub>3</sub>                  | 100                                      | 320          | 442                              | [7]       |
| Sn <sub>4</sub> P <sub>3</sub> /C               | 2000                                     | 500          | 368                              | [8]       |
| Sn <sub>4</sub> P <sub>3</sub> -P<br>@Graphene  | 2000                                     | 1000         | 371                              | [9]       |
| Sn <sub>4</sub> P <sub>3</sub> -C               | 2000                                     | 2000         | 420                              | This work |

- [1] W. Li, S.-L. Chou, J.-Z. Wang, J. H. Kim, H.-K. Liu and S.-X. Dou, *Adv. Mater.* 2014, 26, 4037-4042.
- [2] J. Liu, P. Kopold, C. Wu, P. A. van Aken, J. Maier and Y. Yu, *Energy Environ. Sci.* 2015, 8, 3531-3538.
- [3] J. Y. Jang, Y. Lee, Y. Kim, J. Lee, S.-M. Lee, K. T. Lee, and N.-S. Choi, *J. Mater. Chem. A*, 2015, 3, 8332-8338.
- [4] Q. Li, Z. Li, Z. Zhang, C. Li, J. Ma, C. Wang, X. Ge, S. Dong and L. Yin, *Adv. Energy Mater.* 2016, 6, 1600376.
- [5] J. Qian, Y. Xiong, Y. Cao, X. Ai and H. Yang, *Nano Lett.* 2014, 14, 1865-1869.
- [6] Y. Kim, Y. Kim, A. Choi, S. Woo, D. Mok, N.-S. Choi, Y. S. Jung, J. H. Ryu, S. M. Oh and K. T. Lee, *Adv. Mater.* 2014, 26, 4139-4144.

- [7] S. Liu, H. Zhang, L. Xu, L. Ma and X. Chen, *J. Power Sources*, 2016, 304, 346-353.
- [8] L. Ma, P. Yan, S. Wu, G. Zhu and Y. Shen, *J. Mater. Chem. A*, 2017, 5, 16994-17000.
- [9] Y. Xu, B. Peng and F. M. Mulder, *Adv. Energy Mater.* 2018, 8, 1701847.
